# Supplementary material for: Phylogeography and population structure of the grape powdery mildew fungus, Erysiphe necator, from diverse Vitis species
Source: Springer Nature journal article supplement (doi:10.1186/1471-2148-10-268), 2010-01-01

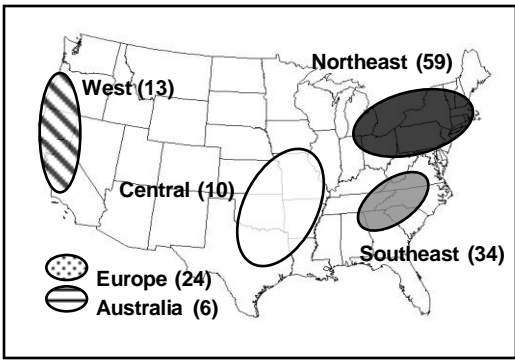

*ITS / IGS*

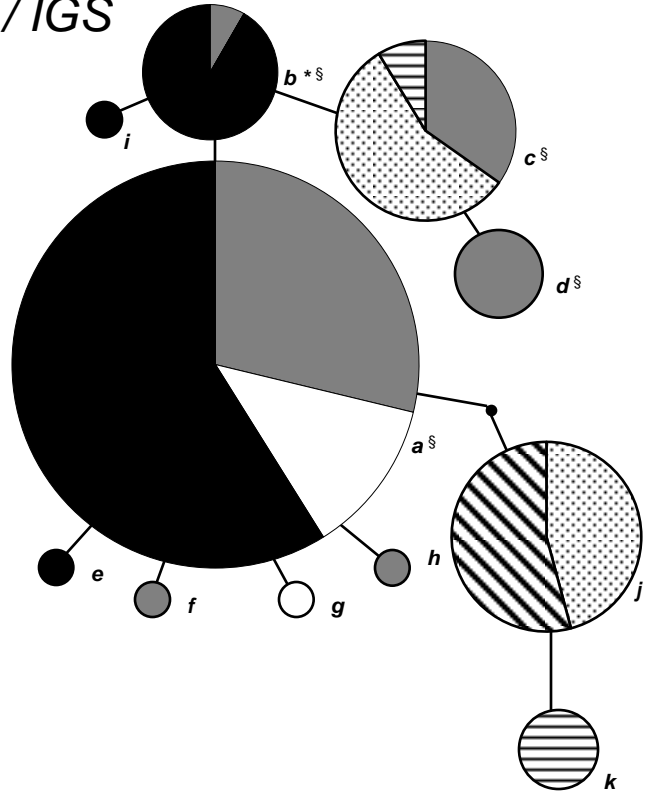

*TUB2*

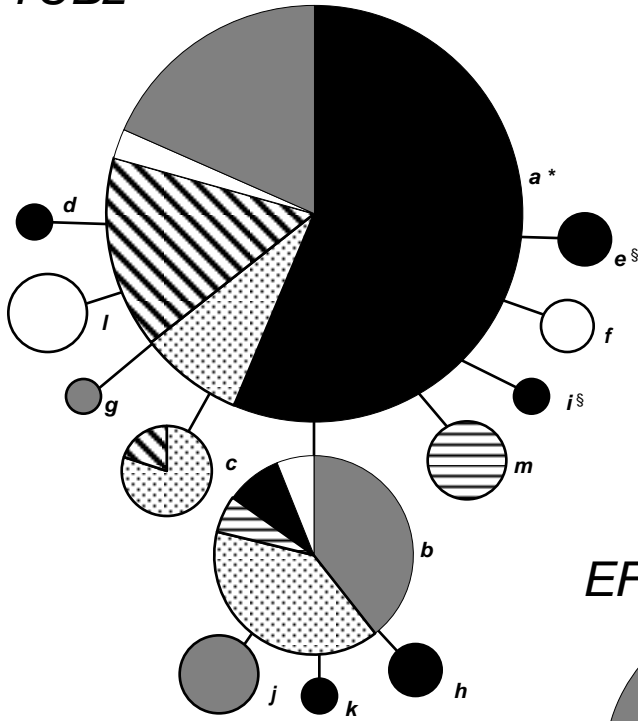

*EF1-α*

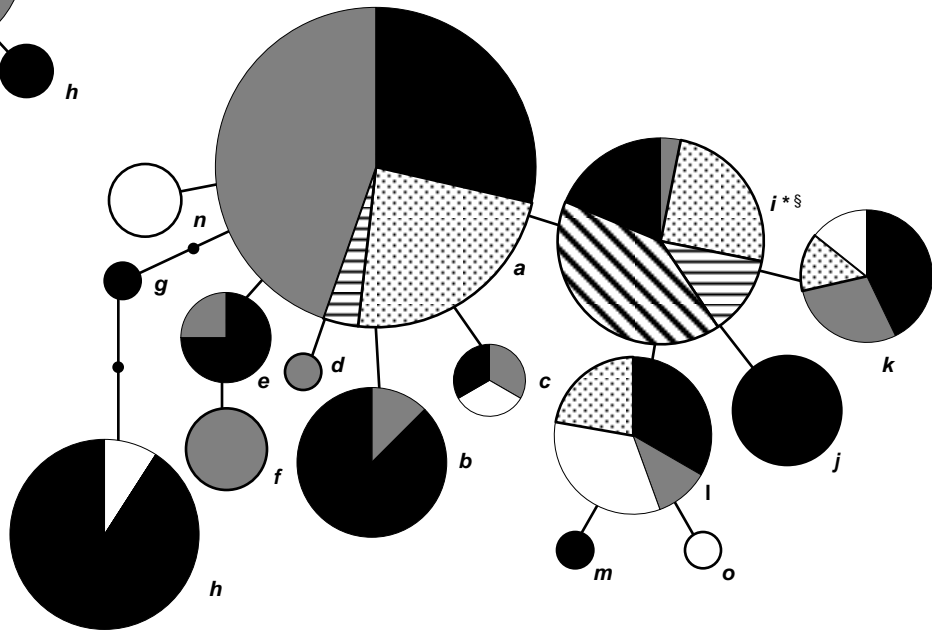

Supplement: 12862_2010_1484_MOESM2_ESM.pdf [file 12862_2010_1484_MOESM2_ESM.pdf]
