# Supplementary material for: Phylogeography and population structure of the grape powdery mildew fungus, Erysiphe necator, from diverse Vitis species
Source: Springer Nature journal article supplement (doi:10.1186/1471-2148-10-268), 2010-01-01

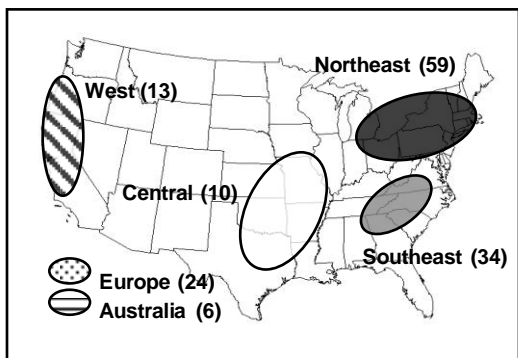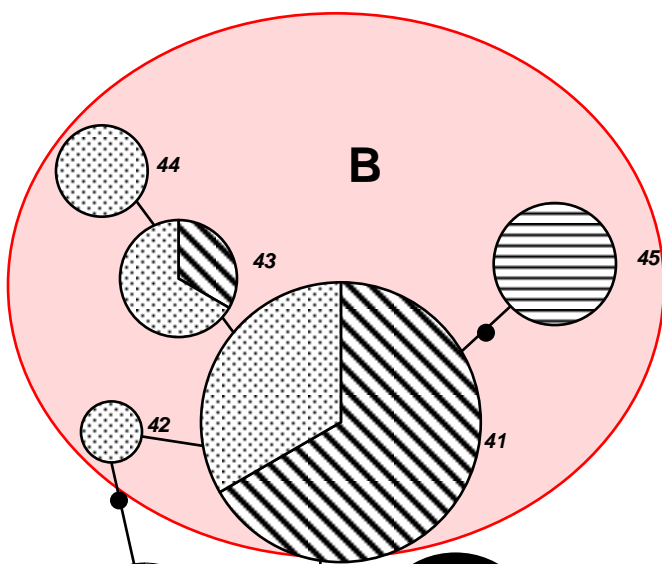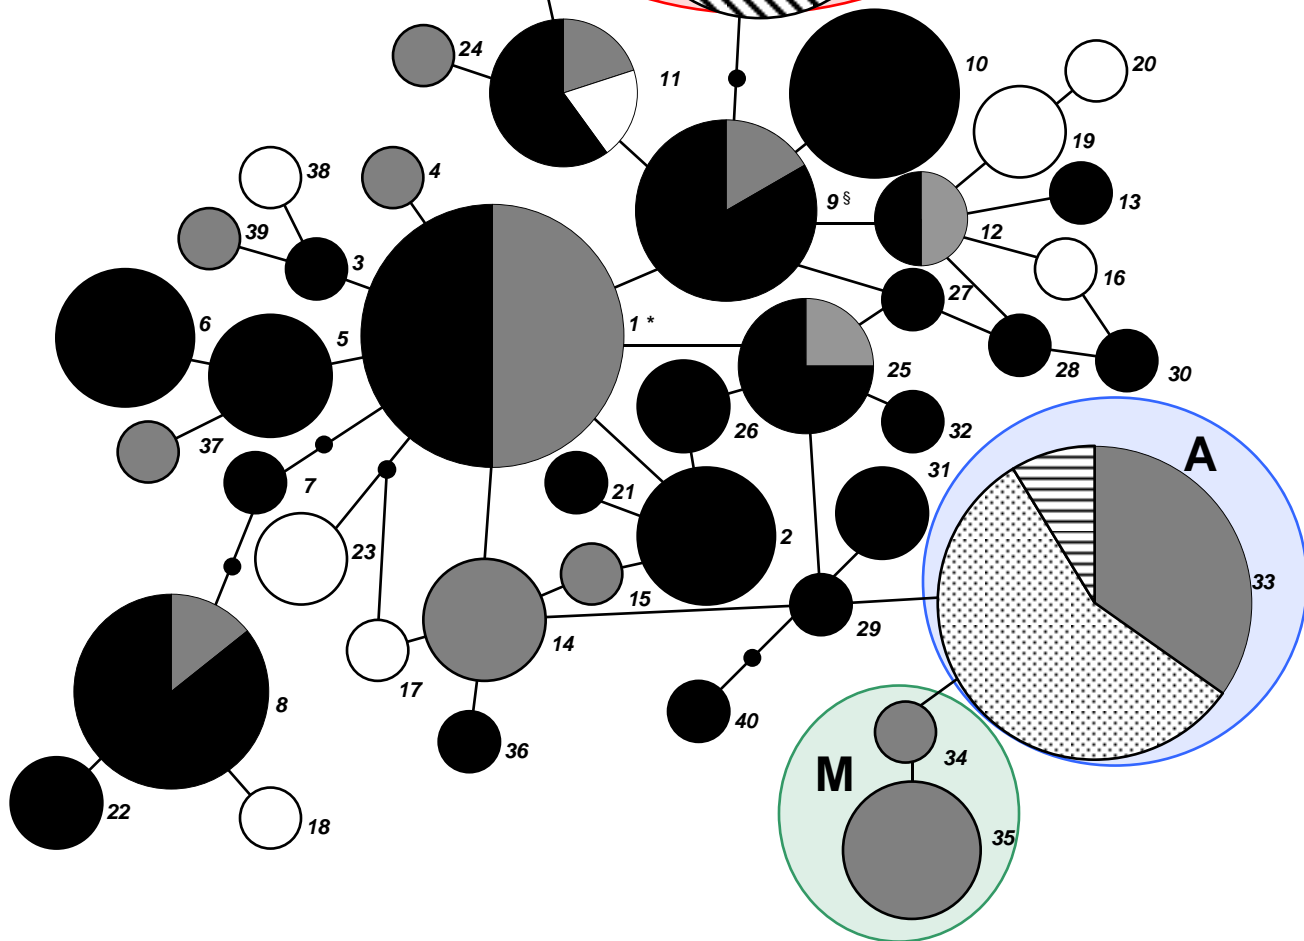

Supplement: 12862_2010_1484_MOESM3_ESM.pdf [file 12862_2010_1484_MOESM3_ESM.pdf]
